# Supplementary material for: Identifying forms of interventions towards cross border malaria in the Asia-Pacific region: a scoping review protocol
Source: PubMed Central journal article supplement — BMJ Open. 2022 Feb 15;12(2):e056265. doi: 10.1136/bmjopen-2021-056265 (PMC8852765; doi:10.1136/bmjopen-2021-056265), 2022-02-15
Supplement: bmjopen-2021-056265supp001.pdf [file bmjopen-2021-056265supp001.pdf]

**Supplementary file 1****Detailed search strategy:**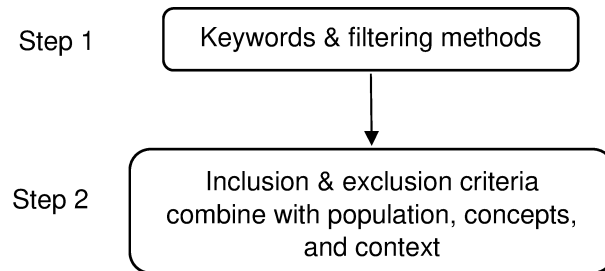**Step 1 – Main search strategy and filtering option**

| Database      | Keyword (1)              | Keyword (2)                                                                | Language filter | Publication time filter      |
|---------------|--------------------------|----------------------------------------------------------------------------|-----------------|------------------------------|
| PubMed        | malaria*<br>(MeSH Terms) | cross\$border OR<br>border*<br>(title/abstract)                            | English         | 1 Jan 2010 to<br>31 Oct 2021 |
| EBSCOHOST     | malaria* (title)         | crossborder OR<br>cross border OR<br>cross-border OR<br>border* (abstract) | English         | 1 Jan 2010 to<br>31 Oct 2021 |
| ProQuest      | malaria* (title)         | crossborder OR<br>cross border OR<br>cross-border OR<br>border (abstract)  | English         | 1 Jan 2010 to<br>31 Oct 2021 |
| ScienceDirect | malaria* (title)         | crossborder OR<br>cross border OR<br>cross-border OR<br>border* (abstract) | English         | 2010-2021                    |

**Step 2 – Hand search strategy for Population, Concepts, and Context (OR)**

| <b>Population</b>                                                                |                                                                                                                                                                                                                                                                                                                                                                                      |
|----------------------------------------------------------------------------------|--------------------------------------------------------------------------------------------------------------------------------------------------------------------------------------------------------------------------------------------------------------------------------------------------------------------------------------------------------------------------------------|
| People or community at risk who live in the cross border area                    | Men OR women; all/document text<br>Pregnant; all/document text<br>Children OR child; all/document text<br>Migrant; all/document text<br>Nomad OR mobile population; all/document text<br>Traveler OR miner OR forest worker; all/document text<br>Vulnerable populations; all/document text                                                                                          |
| <b>Concepts</b>                                                                  |                                                                                                                                                                                                                                                                                                                                                                                      |
| Interventions model or activities of malaria control program at the cross border | Intervention OR activity*; all/document text<br>Diagnosis OR treatment OR prevention; all/document text<br>LLIN OR IRS OR MBS; all/document text<br>Surveillance; all/document text<br>Data sharing; all/document text<br>Notification; all/document text<br>Case finding; all/document text<br>Monitoring and evaluation; all/document text<br>Capacity building; all/document text |
| <b>Context</b>                                                                   |                                                                                                                                                                                                                                                                                                                                                                                      |
| Any areas (districts level, countries level)                                     | National OR district OR village; all/document text<br>(China OR North Korea OR Lao DPR OR Myanmar OR Bhutan OR Nepal OR Vietnam OR Afghanistan OR Bangladesh OR India OR Cambodia OR Malaysia OR Indonesia OR Timor Leste OR Papua New Guinea OR Iran OR Yamen OR Saudi Arabia); all/document text<br>NOR Africa NOR Europe NOR America NOR Australia; abstract                      |
| Any antimalarial activities or phases of malaria control program                 | Control OR elimination OR prevention of re-establishment; all/document text                                                                                                                                                                                                                                                                                                          |
| Any type of mobility in cross border                                             | Land border; all/document text<br>NOR sea border NOR port border; abstract                                                                                                                                                                                                                                                                                                           |
